# Supplementary material
Source: HighWire-hosted journal article supplement (https://srh.bmj.com/highwire/filestream/143050/field_highwire_adjunct_files/3/bmjsrh-2023-201819supp004_data_supplement.pdf)
Supplement: bmjsrh-2023-201819supp004_data_supplement.pdf [file bmjsrh-2023-201819supp004_data_supplement.pdf]

Supplementary table 4 The multinomial probit regression analysis of pandemic-induced exposures on fertility intentions compared with not changed (n=10672)

|                                                                          | Fertility intentions    |                         |                         |                         |                         |                         |
|--------------------------------------------------------------------------|-------------------------|-------------------------|-------------------------|-------------------------|-------------------------|-------------------------|
|                                                                          | Postponed               |                         |                         | Accelerated             |                         |                         |
|                                                                          | Model 1<br>OR (95% CI)  | Model 2<br>AOR (95% CI) | Model 3<br>AOR (95% CI) | Model 1<br>OR (95% CI)  | Model 2<br>AOR (95% CI) | Model 3<br>AOR (95% CI) |
| <b>Testing for COVID-19</b>                                              |                         |                         |                         |                         |                         |                         |
| No                                                                       | 1                       | 1                       | 1                       | 1                       | 1                       | 1                       |
| Yes, always negative                                                     | 0.94 (0.78 to 1.14)     | 0.88 (0.75 to 1.03)     | 0.79 (0.64 to 0.97) *   | 1.13 (0.94 to 1.36)     | 1.08 (0.92 to 1.26)     | 1.11 (0.92 to 1.33)     |
| Yes, at least positive once                                              | 1.30 (0.82 to 2.06)     | 1.26 (0.68 to 2.31)     | 1.05 (0.47 to 2.35)     | 1.37 (0.86 to 2.19)     | 1.55 (0.86 to 2.80)     | 1.45 (0.74 to 2.83)     |
| <b>Isolation/quarantine</b>                                              |                         |                         |                         |                         |                         |                         |
| No                                                                       | 1                       | 1                       | 1                       | 1                       | 1                       | 1                       |
| Yes                                                                      | 1.30 (1.11 to 1.53) **  | 1.29 (1.05 to 1.58) *   | 1.41 (1.18 to 1.69) *** | 1.22 (1.04 to 1.42) *   | 1.28 (1.04 to 1.57) *   | 1.20 (0.99 to 1.46)     |
| <b>Personal income loss</b>                                              |                         |                         |                         |                         |                         |                         |
| No                                                                       | 1                       | 1                       | 1                       | 1                       | 1                       | 1                       |
| Yes                                                                      | 1.51 (1.35 to 1.69) *** | 1.54 (1.35 to 1.74) *** | 1.29 (1.12 to 1.49) *** | 1.30 (1.15 to 1.47) *** | 1.29 (1.08 to 1.53) **  | 1.22 (1.06 to 1.40) **  |
| <b>Living together with a steady partner</b>                             |                         |                         |                         |                         |                         |                         |
| No, s/he stays elsewhere                                                 | 1                       | 1                       | 1                       | 1                       | 1                       | 1                       |
| Yes, the whole time/part of the time                                     | 1.33 (0.93 to 1.89)     | 1.13 (0.77 to 1.66)     | 1.20 (0.83 to 1.72)     | 1.41 (1.08 to 1.84) *   | 1.51 (1.08 to 2.11) *   | 1.57 (1.10 to 2.23) *   |
| <b>Mental health compared with three months before COVID-19 measures</b> |                         |                         |                         |                         |                         |                         |
| <b>Frequency of getting angry</b>                                        |                         |                         |                         |                         |                         |                         |
| Same or less                                                             | 1                       | 1                       | 1                       | 1                       | 1                       | 1                       |
| More                                                                     | 1.43 (1.30 to 1.58) *** | 1.51 (1.37 to 1.67) *** | 1.30 (1.18 to 1.43) *** | 1.10 (1.02 to 1.19) *   | 1.09 (1.01 to 1.19) *   | 0.98 (0.87 to 1.09)     |
| <b>Frequency of feeling frustrated</b>                                   |                         |                         |                         |                         |                         |                         |
| Same or less                                                             | 1                       | 1                       | 1                       | 1                       | 1                       | 1                       |
| More                                                                     | 1.42 (1.27 to 1.59) *** | 1.49 (1.29 to 1.73) *** | 1.21 (1.04 to 1.41) *   | 1.06 (0.93 to 1.21)     | 1.12 (0.96 to 1.30)     | 0.99 (0.83 to 1.18)     |
| <b>Frequency of feeling bored</b>                                        |                         |                         |                         |                         |                         |                         |

|                                             |                         |                         |                         |                         |                         |                     |
|---------------------------------------------|-------------------------|-------------------------|-------------------------|-------------------------|-------------------------|---------------------|
| Same or less                                | 1                       | 1                       | 1                       | 1                       | 1                       | 1                   |
| More                                        | 1.27 (1.14 to 1.42) *** | 1.33 (1.19 to 1.49) *** | 1.09 (0.99 to 1.19)     | 1.09 (0.93 to 1.28)     | 1.13 (0.93 to 1.37)     | 1.10 (0.87 to 1.39) |
| <b>Frequency of worrying about finances</b> |                         |                         |                         |                         |                         |                     |
| Same or less                                | 1                       | 1                       | 1                       | 1                       | 1                       | 1                   |
| More                                        | 1.65 (1.39 to 1.95) *** | 1.70 (1.46 to 1.98) *** | 1.43 (1.16 to 1.75) *** | 1.23 (1.10 to 1.38) *** | 1.21 (1.09 to 1.35) *** | 1.20 (0.98 to 1.47) |

Model 1: Crude odd ratios.

Model 2: After controlling for confounding variables (age, age<sup>2</sup>, relationship status, education, religion, number of children), the above key explanatory variables were tested individually.

Model 3: After controlling for confounding variables (age, age<sup>2</sup>, relationship status, education, religion, number of children), the above key explanatory variables were tested simultaneously.

OR: odd ratios; AOR: Adjusted odd ratios.

95% confidence intervals in brackets

\* p < 0.05, \*\* p < 0.01, \*\*\* p < 0.001.
